# Supplementary material for: Midwives’ perceptions of enablers and barriers of quality maternal healthcare in a rural public hospital in the Northern Cape Province
Source: Research Square preprint supplement (doi:10.21203/rs.3.rs-8243812/v1), 2026-01-23
Supplement: Supplementary file 1 [file 4d0ef98198f37d6228f64fbf.docx]

**DATA COLLECTION TOOL/INTERVIEW SCHEDULE**

**All participants will be asked the following main questions and other questions will be directed by the participants’ response.**

- What are the perceptions of midwives regarding the enablers of quality maternal healthcare in a rural public hospital in the Northern Cape Province?
- What are the perceptions of midwives regarding the barriers towards quality maternal healthcare in a rural public hospital in the Northern Cape Province?

**The following questions will be used as follow-up questions:**

- What is the quality of maternal healthcare at this hospital?
- Please tell me more about the barriers you have experienced in delivering quality maternal healthcare as a midwife in this hospital.
- Are the facilitators or enablers that you have experienced that help you deliver quality maternal healthcare? If so, can you tell me more?
- Tell me more about your experiences as a midwife in this hospital.
- Do you have any recommendations for midwives regarding delivery of quality maternal healthcare in this hospital?
