# Supplementary material for: Midwives’ perceptions of enablers and barriers of quality maternal healthcare in a rural public hospital in the Northern Cape Province
Source: Research Square preprint supplement (doi:10.21203/rs.3.rs-8243812/v1), 2026-01-23
Supplement: Supplementary file 1 [file de4e7195f7f4051d485fb3f2.pdf]

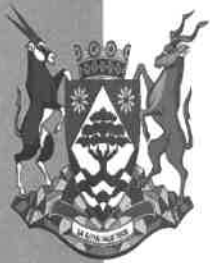

DEPARTMENT OF HEALTH

LEFAPHA LA MAPHELO

DEPARTEMENT VAN GESONDHEID

ISEBE LEZEMPILO

Office of Deputy Director -General  
Northern Cape Dept of Health  
Private Bag X5049  
Kimberley  
8300  
Tel: 053 830 2153/148  
Email: pahodhealth@ncpg.gov.za

Enquiries : Mr. B Kgatwe  
Dipatlisiso : BMashute@ncpg.gov.za

Imibuzo : NC\_202404\_002  
Navrae :

Date : 25 April 2024  
Leshupelo :  
Umhla :  
Datum :

Mr. Motheo Bargio Morena  
27 Steyn Street  
Stilfontein  
2551

---

***Title: Midwives' perceptions of enablers and barriers of quality  
maternal healthcare in a rural public hospital in the Northern Cape  
Province.***

---

**Dear. Mr. Morena**

The application requesting permission to conduct the above-mentioned research study was received and reviewed by the Northern Cape Department of Health.

Decision: Permission is granted to conduct this research project in the Tshwaragano Hospital as specified in the research proposal.

The reference number for this research project is NC\_202404\_002, and please use this reference with all your communication with the Research Coordinator.

**Please note the following:**

1. This approval is valid for one year from the approval date.
2. Should this research study need more than one year, the researcher must annually submit the progress report to the department and request an extension.

3. The researcher must make all the necessary arrangements with the facility managers to ensure that healthcare services are not affected when this project is being conducted.

**Please note the following conditions:**

1. This research project must be conducted at no cost to the Northern Cape Department of Health.
2. The approval is limited to the research proposal submitted on the application.
3. There must be no modifications or amendments to the research project.
4. The Research Unit may monitor this research project at any time.
5. At the completion of this research project, a copy of the final report must be submitted to the Research Unit.
6. The Northern Cape Department of Health Senior Management must be briefed on the outcome of the study before publishing.



Mr. M Mlatha  
Acting Head of Department  
Northern Cape Province  
Department of Health

10 05 24  
Date
